# Supplementary material
Source: HighWire-hosted journal article supplement (http://www.annfammed.org/highwire/filestream/8519/field_highwire_adjunct_files/8/Goldman_Supp_App_4.pdf)
Supplement: Goldman_Supp_App_4.pdf [file Goldman_Supp_App_4.pdf]

**Goldman R, Parker DR, Brown J, Walker J, Eaton CB, Borkan JM. Recommendations for a Mixed Methods Approach for Evaluating the Patient-Centered Medical Home. Ann Fam Med. 2015;13:null-null.**

**Supplemental Appendix 4. Staff Demographic Questionnaire**

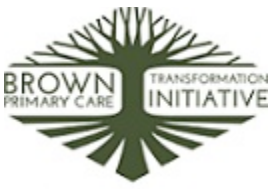

Practice \_\_\_\_\_

Date \_\_\_\_ / \_\_\_\_ / \_\_\_\_

## Practice Staff Demographic Questionnaire

(to be completed by all Practice Staff)

*Please circle the appropriate response or fill in the blanks below.*

Q1. What is the highest education level you completed \_\_\_\_\_?

Q2. What type of practice employs you?

1= HMO

2= Solo

3= Single Specialty Group

4= Residency Training Practice

Q3. What is your age?

\_\_\_\_\_ years

Q3. What is your gender?

1=Male

2=Female

Q4. What is your race/ethnicity?

1= White, not Hispanic/Latino

2= Black or African American

3= American Indian

4= Asian

5= Native Hawaiian or Pacific Islander

6= Hispanic/Latino

7= Other

If Other, then specify \_\_\_\_\_

Q5. How long have you been working at this practice? \_\_\_\_\_
